# Supplementary material
Source: MDPI journal article supplement (https://www.mdpi.com/1424-8247/16/9/1209)
Supplement: s1 [file s1]

# Antioxidant Effects of Quercetin Nanocrystals in Nanosuspension against Hydrogen Peroxide-induced Oxidative Stress in a Zebrafish Model

Junjie Wang <sup>1,2</sup>, Xinyue Xue <sup>1</sup> and Xiaoqing Miao <sup>1,\*</sup>

<sup>1</sup> Marine College, Shandong University, Weihai, Shandong, 264209, China

<sup>2</sup> SDU-ANU Joint Science College, Shandong University, Weihai, Shandong, 264209, China

\* Correspondence: xiaoqingmiao@sdu.edu.cn

## Supplementary Materials

### Overview

**Table S1.** Variations of average particle sizes, PDI, and zeta potential of QUE-NCs suspensions.

**Table S2.** Preparation processes of different QUE-NCs.

**Figure S1.** Survival rates and lateral photographs of zebrafish incubated in (A) coarse QUE suspensions, (B) 50-QUE-PM, (C) 140-QUE-PM, (D) 360-QUE-PM.

**Figure S2.** The photographs of DCFH-DA, DPPP, and AO staining of zebrafish from coarse QUE-, 50-QUE-PM-, 140-QUE-PM-, and 360-QUE-PM-treated groups.

**Table S1.** Variations of average particle sizes, PDI, and zeta potential of QUE-NCs suspensions.

| Types              | Time (day) | Average particle size (nm) | PDI           | Zeta potential (mV) |
|--------------------|------------|----------------------------|---------------|---------------------|
| Small<br>(50 nm)   | 1          | 51.3 ± 0.1                 | 0.184 ± 0.016 | -16.4 ± 2.3         |
|                    | 2          | 99.9 ± 0.9                 | 0.222 ± 0.003 | -14.9 ± 1.0         |
|                    | 3          | 158.0 ± 2.5                | 0.274 ± 0.010 | -14.1 ± 2.7         |
|                    | 4          | 253.1 ± 5.7                | 0.319 ± 0.036 | -16.3 ± 0.9         |
|                    | 5          | 179.8 ± 5.0                | 0.211 ± 0.015 | -18.5 ± 3.2         |
|                    | 6          | Micro precipitation        | /             | 0.1 ± 0.2           |
|                    | 8          | Mass precipitation         | /             | 0.1 ± 0.1           |
| Medium<br>(140 nm) | 1          | 139.0 ± 0.6                | 0.068 ± 0.012 | -15.1 ± 0.7         |
|                    | 2          | 195.6 ± 3.8                | 0.149 ± 0.013 | -11.0 ± 0.4         |
|                    | 3          | 251.6 ± 4.4                | 0.188 ± 0.029 | -15.3 ± 2.0         |
|                    | 4          | 247.7 ± 4.9                | 0.205 ± 0.010 | -14.5 ± 0.7         |
|                    | 5          | 250.9 ± 8.6                | 0.171 ± 0.013 | -16.5 ± 0.2         |
|                    | 6          | Mass precipitation         | /             | -0.1 ± 0.2          |
| Large<br>(360 nm)  | 1          | 358.9 ± 4.7                | 0.168 ± 0.022 | -13.6 ± 0.6         |
|                    | 2          | 394.0 ± 0.8                | 0.214 ± 0.056 | -10.6 ± 2.5         |
|                    | 3          | 449.1 ± 2.4                | 0.119 ± 0.030 | -9.0 ± 0.6          |
|                    | 4          | 518.4 ± 1.3                | 0.241 ± 0.004 | -9.9 ± 0.9          |
|                    | 5          | 624.4 ± 14.1               | 0.334 ± 0.041 | -8.5 ± 0.1          |
|                    | 6          | 850.0 ± 34.0               | 0.337 ± 0.057 | -7.5 ± 0.0          |
|                    | 7          | Mass precipitation         | /             | 0.0 ± 0.1           |

**Table S2.** Preparation processes of different QUE-NCs.

| QUE-NCs                  | Small particle size<br>(50 nm)                                                                | Medium particle size<br>(140 nm)                                                              | Large particle size<br>(360 nm)                                                               |
|--------------------------|-----------------------------------------------------------------------------------------------|-----------------------------------------------------------------------------------------------|-----------------------------------------------------------------------------------------------|
| Formulation:             | Organic phase:<br>1 mL of 10 mg/mL QUE<br>ethanol solution;                                   | Organic phase:<br>2 mL of 10 mg/mL QUE<br>ethanol solution;                                   | Organic phase:<br>1 mL of 10 mg/mL QUE<br>ethanol solution;                                   |
|                          | Aqueous phase:<br>1 mL of 20 mg/mL PVP<br>mixed with 18 mL of water.                          | Aqueous phase:<br>3 mL of 20 mg/mL PVP<br>mixed with 15 mL of water.                          | Aqueous phase:<br>3 mL of 20 mg/mL PVP<br>mixed with 6 mL of water.                           |
| Preparations<br>process: | The organic phase was<br>injected into the aqueous<br>phase at 1000 rpm at 6<br>mL/min (5 s). | The organic phase was<br>injected into the aqueous<br>phase at 1000 rpm at 6<br>mL/min (5 s). | The organic phase was<br>injected into the aqueous<br>phase at 1000 rpm at 6<br>mL/min (5 s). |

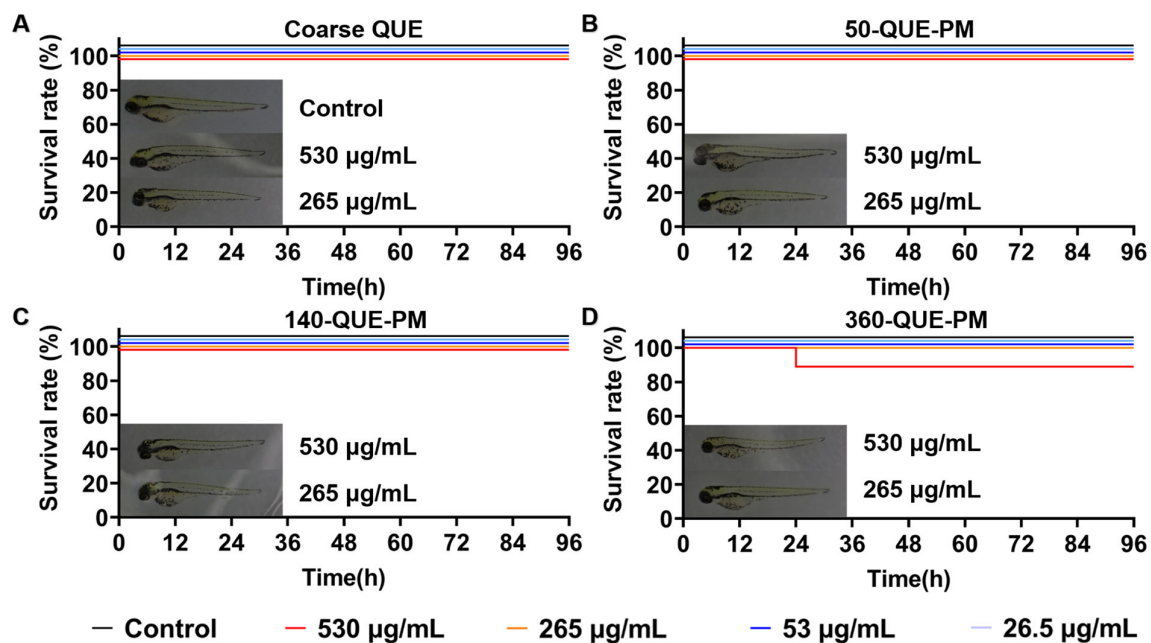

**Figure S1.** Survival rates and lateral photographs of zebrafish incubated in (A) coarse QUE suspensions, (B) 50-QUE-PM, (C) 140-QUE-PM, and (D) 360-QUE-PM.

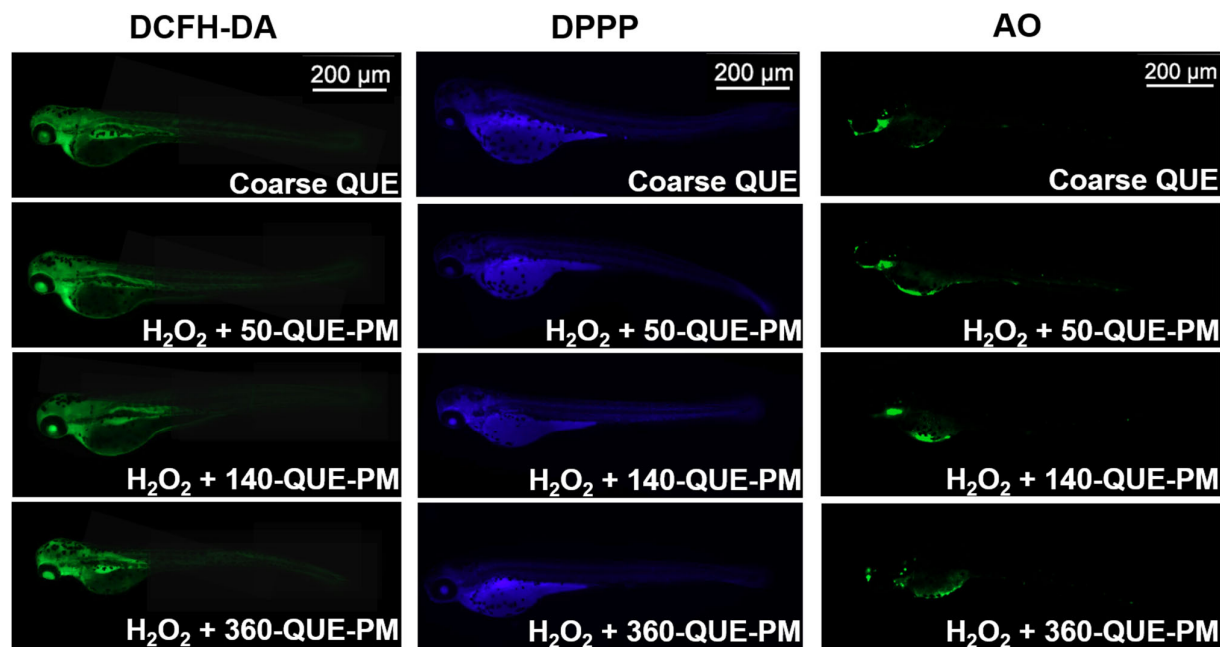

**Figure S2.** The photographs of DCFH-DA, DPPH, and AO staining of zebrafish from coarse QUE-, 50-QUE-PM-, 140-QUE-PM-, and 360-QUE-PM-treated groups.
